# Supplementary material for: Electroporation enables the efficient mRNA delivery into the mouse zygotes and facilitates CRISPR/Cas9-based genome editing
Source: PubMed Central journal article supplement (PMC4463957; doi:10.1038/srep11315), 2015-06-11
Supplement: srep11315-s1.pdf [file srep11315-s1.pdf]

## Supplementary Information

Electroporation enables the efficient mRNA delivery into the mouse zygotes and facilitates CRISPR/Cas9-based genome editing.

Masakazu Hashimoto<sup>1,\*</sup> and Tatsuya Takemoto<sup>2,\*</sup>

<sup>1</sup>Division of Developmental Biology, Graduate School of Medicine, Chiba University, Inohana 1-8-1, Chuo-ku, Chiba, 260-8670, Japan, <sup>2</sup>Division of Embryology, Fujii Memorial Institute of Medical Sciences, The University of Tokushima, 3-18-15 kuramoto-cho, Tokushima 770-8503, Japan

## Supplementary Figure S1

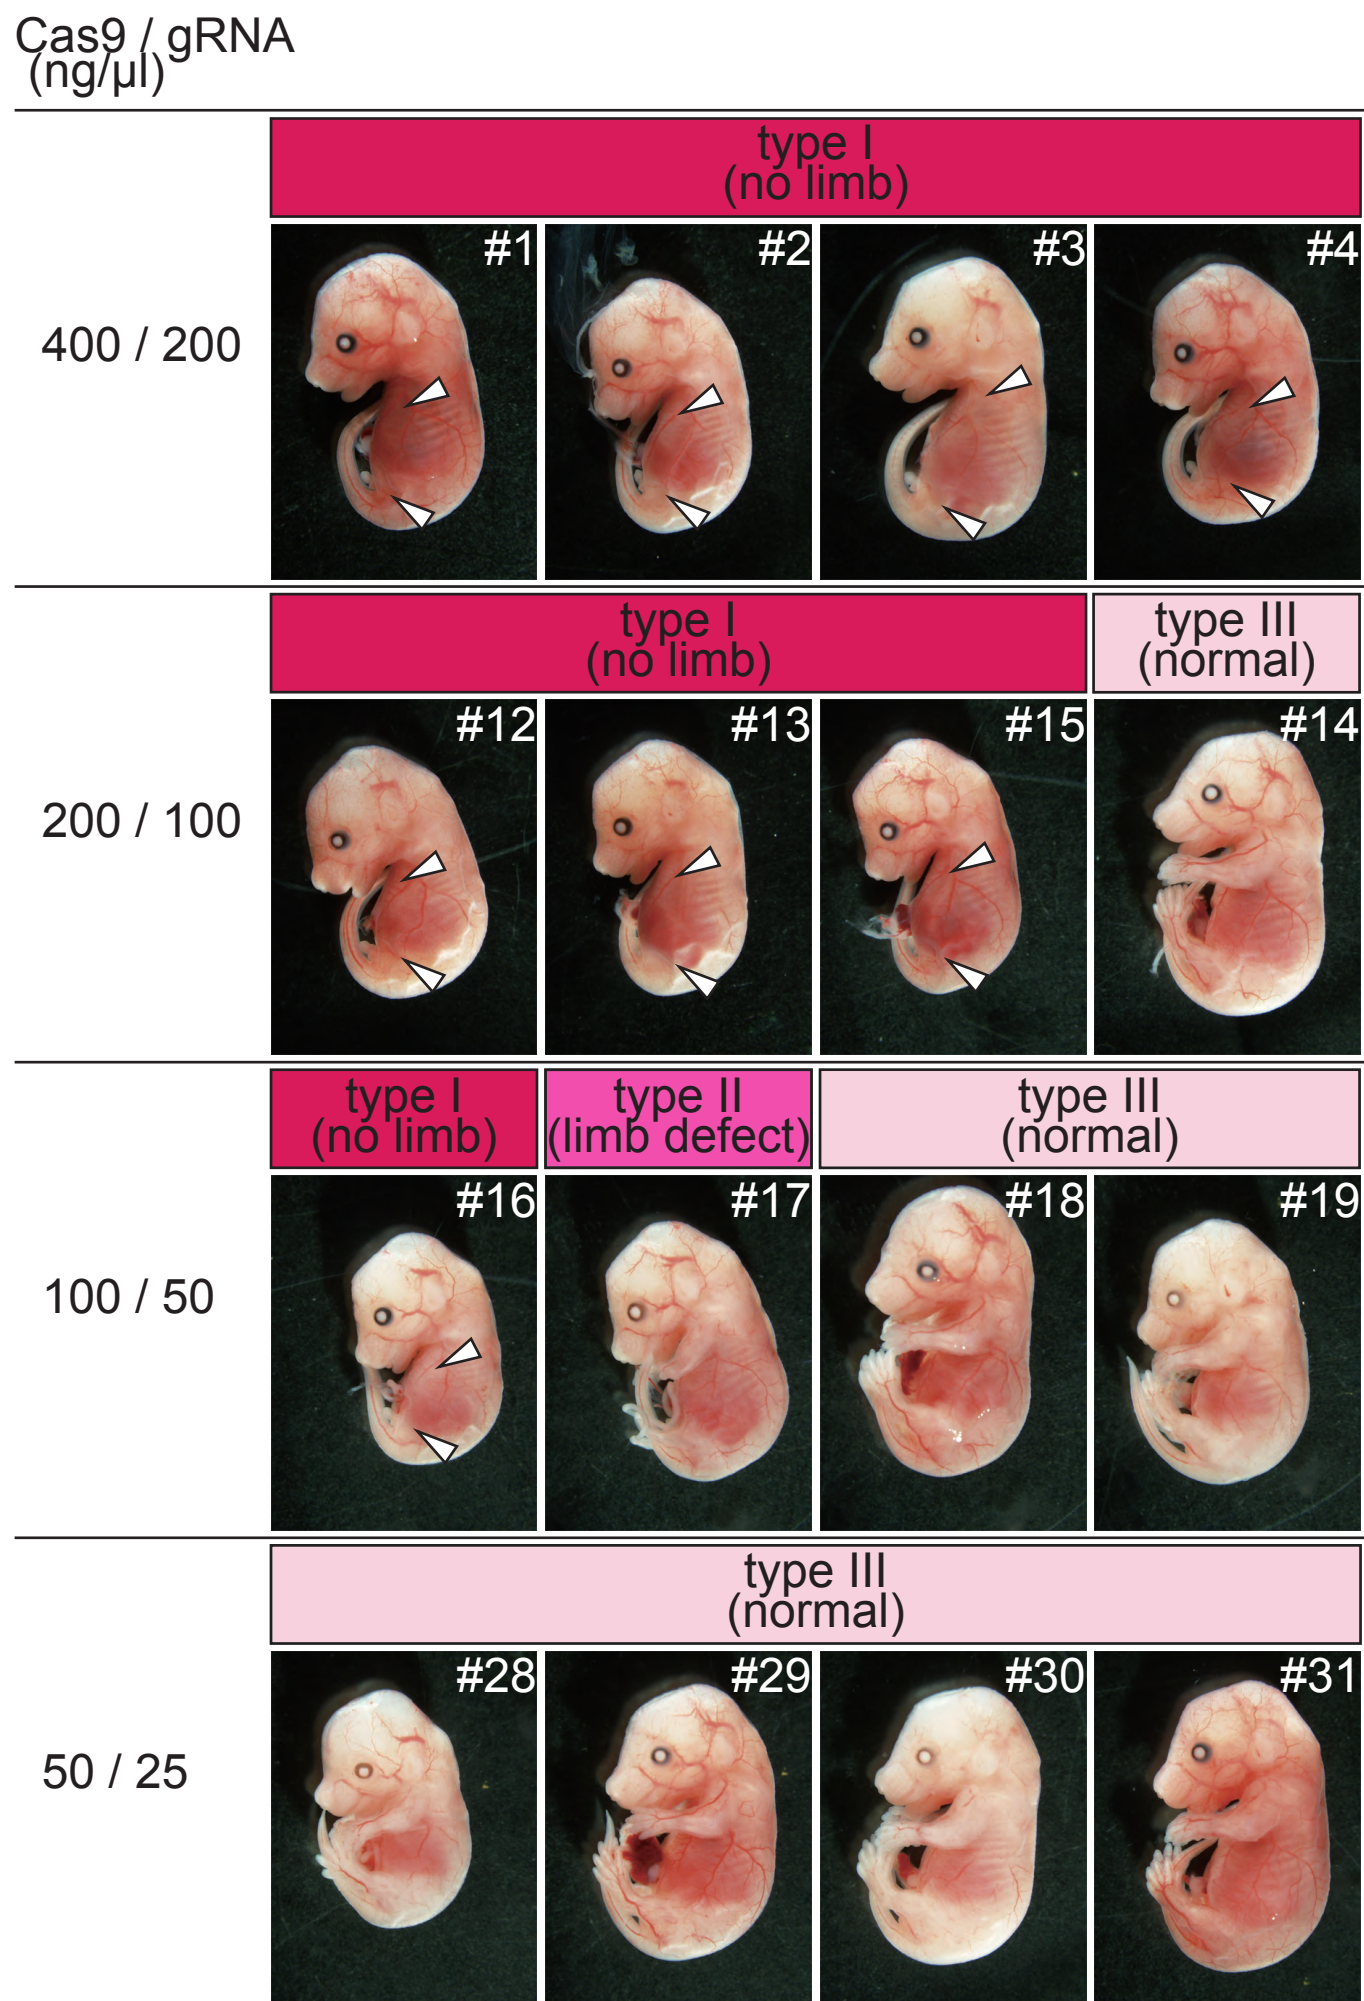

### Supplementary Figure S1. Embryos analyzed for their *Fgf10* gene sequence.

The genomic sequence of the *Fgf10* locus was analyzed for four selected embryos generated from eggs electroporated with various concentrations of *Cas9* mRNA and gRNA (Supplementary Table 2). Embryos were categorized into three types (I, II, or III) based on their limb phenotype.

## Supplementary Figure S2

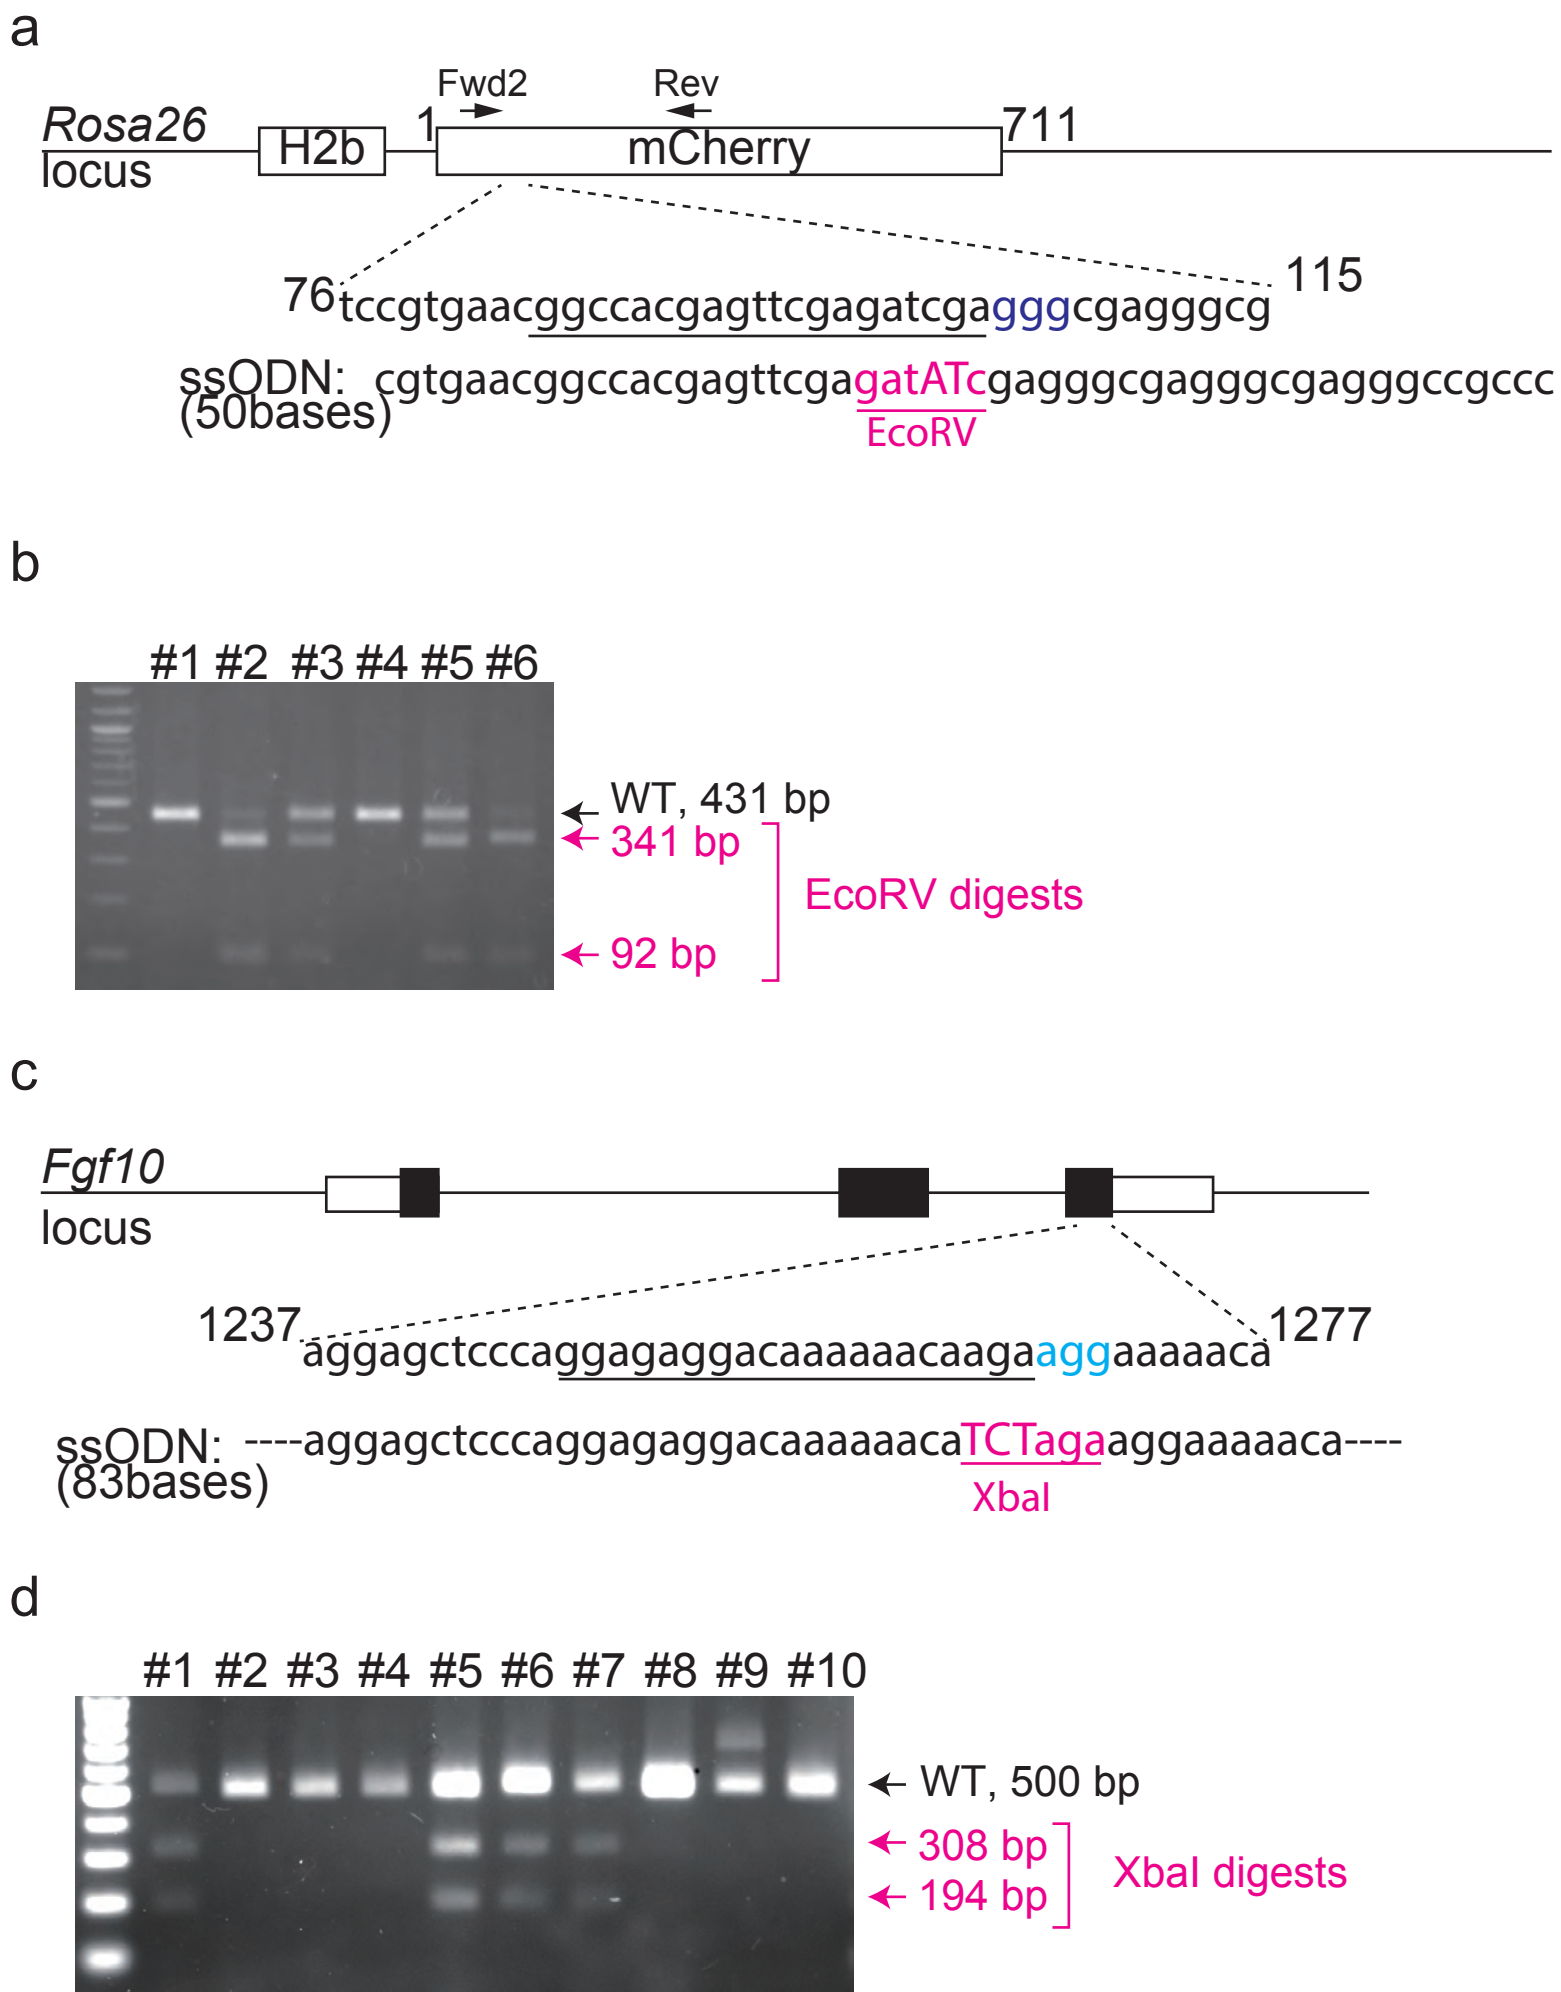

### Supplementary Figure 2. HDR-mediated insertion of a restriction enzyme recognition sequence.

(a) Schematic of the target sequence and the ssODN designed to insert the EcoRV recognition site (shown in red) into the *mCherry* locus. The protospacer-adjacent motif (PAM) sequence is shown in blue. Black underline indicates the gRNA recognition sequence (protospacer sequence). (b) RFLP analysis of the collected embryos. EcoRV-inserted alleles were digested into two bands (341 bps and 92 bps). The intact allele had 431 bps. The digested bands were observed in embryos # 2, 3, 5, and 6. The PAM sequence is shown in blue. Black underline indicates the gRNA recognition sequence (Protospacer sequence). (c) Schematic of the target sequence and the ssODN designed to insert the XbaI recognition site (shown in red) into the *Fgf10* locus. (d) RFLP analysis. XbaI-inserted alleles were digested into two bands (308 bps and 194 bps). The two digested bands were observed in embryos #1, 5, 6, and 7.

Supplementary Table S1: Generation of *Fgf10* mutant embryos by Cas9 mRNA and gRNA electroporation

|       | Cas9/ sgRNA (ng/ $\mu$ l) | No. electroporation /transferred (%) | No.(%) embryos | No.(%) limb defects |
|-------|---------------------------|--------------------------------------|----------------|---------------------|
| Fgf10 | 400 / 200                 | 80 / 75 (94)                         | 39 (52)        | 38 (97)             |
|       | 200 / 100                 | 63 / 60 (95)                         | 38 (63)        | 31 (82)             |
|       | 100 / 50                  | 64 / 60 (94)                         | 43 (72)        | 19 (46)             |
|       | 50 / 25                   | 35 / 33 (94)                         | 17 (51)        | 3 (12)              |



# Supplementary Table S2: Sequence analysis of Fgf10 mutants

| Cas9/gRNA (ng/μl) | WT                                                                       | mutant                                                                   | Ratio          | Effect         |
|-------------------|--------------------------------------------------------------------------|--------------------------------------------------------------------------|----------------|----------------|
| 400/200           | WT                                                                       | tgaatggaaaaaggagctcccaaggagagacaaaaacaaga <u>agg</u> aaaaaacacctctgctca  |                |                |
|                   | #1                                                                       | tgaatggaaaaaggagctcccaaggagagacaaaaaac-----ctctgctca                     | 5/10           | 15 bp deletion |
|                   |                                                                          | tgaatggaaaaaggag-----aggaaaaaaacacctctgctca                              | 3/10           | 26 bp deletion |
|                   |                                                                          | tgaatggaaaaaggagctcccaaggagagacaaaaa--agaaggaaaaaacacctctgctca           | 2/10           | 3 bp deletion  |
|                   | #2                                                                       | tgaatggaaaaaggagctcccaaggagagacaaaaaca-----cctctgctca                    | 6/10           | 13 bp deletion |
|                   |                                                                          | tgaatggaaaaaggagctcccaaggagagacaaaaa-----cacctctgctca                    | 4/10           | 14 bp deletion |
|                   |                                                                          | tga-----ggaaaaaacacctctgctca                                             | 4/10           | 38 bp deletion |
|                   | #3                                                                       | tgaatggaaaaaggagctcccaaggagagacaaaaa-----ggaaaaaacacctctgctca            | 4/10           | 6 bp deletion  |
|                   |                                                                          | tgaatggaaaaaggagctcccaaggagagacaaaaa-----cacctctgctca                    | 1/10           | 14 bp deletion |
|                   |                                                                          | tgaatggaaaaaggagctcccaaggagagacaaaaa <u>Ag</u> aaggaaaaaacacctctgctca    | 1/10           | 1 bp insertion |
| 200/100           |                                                                          | tgaatggaaaaaggag-----aggcaaaaaacaagaaggaaaaaacacctctgctca                | 2/8            | 10 bp deletion |
|                   | #4                                                                       | tgaatggaaaaaggagctcccaaggag-----aggaaaaaacacctctgctca                    | 2/8            | 15 bp deletion |
|                   |                                                                          | tgaatggaaaaaggagctcccaaggagacaaaaa-----cacctctgctca                      | 2/8            | 14 bp deletion |
|                   |                                                                          | tgaatggaaaaaggagctcccaaggagagacaaaaa <u>Ag</u> aaggaaaaaacacctctgctca    | 2/8            | 1 bp insertion |
|                   | #12                                                                      | tgaatggaaaaaggagctcccaaggag-----aaggaaaaaacacctctgctca                   | 3/10           | 13 bp deletion |
|                   |                                                                          | tgaatggaaaaaggagctcccaaggagagacaaaa-----ggaaaaaacacctctgctca             | 3/10           | 10 bp deletion |
|                   |                                                                          | tgaatggaaaaaggagctcccaaggagagacaaaaa-----cctctgctca                      | 2/10           | 13 bp deletion |
|                   |                                                                          | tgaatggaaaaaggagctcccaaggagagacaaaaa <u>AA</u> Acacctctgctca             | 1/10           | 3 bp insertion |
|                   |                                                                          | tgaatggaaaaaggagctcccaaggagagacaaaaa <u>A</u> caaggaaaaaacacctctgctca    | 1/10           | 1 bp insertion |
|                   |                                                                          | tgaatggaaaaaggagctcccaaggagagacaaaaa-----ggaaaaaacacctctgctca            | 2/8            | 7 bp deletion  |
|                   | tgaatggaaaaaggagctcccaaggagagacaaaaa <u>A</u> caaggaaaaaacacctctgctca    | 2/8                                                                      | 1 bp insertion |                |
|                   | tgaatggaaaaaggagctcccaaggagagacaaaaa <u>A</u> caaggaaaaaacacctctgctca    | 2/8                                                                      | 1 bp insertion |                |
|                   | tgaatggaaaaaggagctcccaaggagagacaaaaa-----cacctctgctca                    | 1/8                                                                      | 15 bp deletion |                |
|                   | tgaatggaaaaaggagctcccaaggagagacaaaaa- <u>ca</u> gaaggaaaaaacacctctgctca  | 1/8                                                                      | 1 bp deletion  |                |
|                   | tgaatggaaaaaggagctcccaaggagagacaaaaa <u>Ag</u> aaggaaaaaacacctctgctca    | 5/9                                                                      | 1 bp insertion |                |
| #15               | tgaatggaaaaaggagctcccaaggagagacaaaaa-----cctctgctca                      | 3/9                                                                      | 13 bp deletion |                |
|                   | -----aacacctctgctca                                                      | 1/9                                                                      | long deletion  |                |
|                   | tgaatggaaaaaggagctcccaaggag-----aggaaaaaacacctctgctca                    | 5/8                                                                      | 15 bp deletion |                |
| #14               | tgaatggaaaaaggagctcccaaggagagacaaaaa-----ggaaaaaacacctctgctca            | 2/8                                                                      | 6 bp deletion  |                |
|                   | tgaatggaaaaaggagctcccaaggagagacaaaaa-----cacctctgctca                    | 1/8                                                                      | 15 bp deletion |                |
| 100/50            | #16                                                                      | tgaatggaaaaaggagctcccaaggagagacaaaaa-----cctctgctca                      | 5/10           | 13 bp deletion |
|                   |                                                                          | tgaatggaaaaaggagctcccaaggagagacaaaaa <u>Ag</u> aaggaaaaaacacctctgctca    | 5/10           | 1 bp insertion |
|                   | #17                                                                      | tgaatggaaaaaggagctcccaaggagagacaaaaa-----cctctgctca                      | 8/9            | 13 bp deletion |
|                   |                                                                          | tgaatggaaaaaggagctcccaaggagagacaaaaa-- <u>ga</u> aggaaaaaacacctctgctca   | 1/9            | 3 bp deletion  |
|                   | #18                                                                      | tgaatggaaaaaggagctcccaaggagagacaaaaa <u>CTCTGCTCA</u>                    | 8/10           | wild-type      |
|                   |                                                                          | -----CCTCTGCTCA                                                          | 2/10           | 15 bp deletion |
|                   | #19                                                                      | tgaatggaaaaaggagctcccaaggagagacaaaaa <u>ca</u> gaaggaaaaaacacctctgctca   | 8/9            | wild-type      |
|                   |                                                                          | tgaatggaaaaaggagctcccaaggagagacaaaaa <u>G</u> aaaaaacacctctgctca         | 1/9            | 1 bp mutation  |
|                   | #28                                                                      | tgaatggaaaaaggagctcccaaggagagacaaaaa <u>ca</u> gaaggaaaaaacacctctgctca   | 8/10           | wild-type      |
|                   |                                                                          | tgaatggaaaaaggagctcccaaggagagacaaaaa <u>ca</u> Agaaaggaaaaaacacctctgctca | 1/10           | 2 bp insertion |
| #29               | tgaatggaaaaaggagctcccaaggagagacaaaaa <u>ca</u> agGagaaaaaacacctctgctca   | 1/10                                                                     | 1 bp mutation  |                |
|                   | tgaatggaaaaaggagctcccaaggagagacaaaaa <u>ca</u> gaaggaaaaaacacctctgctca   | 7/10                                                                     | wild-type      |                |
|                   | tgaatggaaaaaggagctcccaaggagagacaaaaa-- <u>ga</u> aggaaaaaacacctctgctca   | 3/10                                                                     | 3 bp deletion  |                |
| #30               | tgaatggaaaaaggagctcccaaggagagacaaaaa <u>ca</u> gaaggaaaaaacacctctgctca   | 5/10                                                                     | wild-type      |                |
|                   | tgaatggaaaaaggagctcccaaggagagacaaaaa <u>G</u> caagaaggaaaaaacacctctgctca | 2/10                                                                     | 1 bp mutation  |                |
|                   | tgaatggaaaaaggagctcccaaggagagacaaaaa <u>ca</u> Agaaaggaaaaaacacctctgctca | 2/10                                                                     | 2 bp insertion |                |
|                   | tgaatggaaaaaggagctcccaaggagagacaaaaa-- <u>g</u> gaaggaaaaaacacctctgctca  | 1/10                                                                     | 2 bp deletion  |                |
|                   | tgaatggaaaaaggagctcccaaggagagacaaaaa <u>ca</u> gaaggaaaaaacacctctgctca   | 8/10                                                                     | wild-type      |                |
| #31               | tgaatggaaaaaggagctcccaaggagagacaaaaa <u>G</u> caagaaggaaaaaacacctctgctca | 1/10                                                                     | 1 bp mutation  |                |
|                   | tgaatggaaaaaggagctcccaaggagagacaaaaa <u>ca</u> Agaaaggaaaaaacacctctgctca | 1/10                                                                     | 1 bp mutation  |                |

Sequence used as a target is underlined. Blue color indicates the protospacer-adjacent motif (PAM) sequence. Base-substitutions are shown in capitals.

Supplementary Table S3: Sequence analysis of HDR-mediated knock-in embryos

|                                           |                                                                                         |       |                               |
|-------------------------------------------|-----------------------------------------------------------------------------------------|-------|-------------------------------|
| gtgaacggccacgagttcgagatcga <u>ggg</u> cga |                                                                                         |       |                               |
| #3                                        | gtgaa <b>TTCA</b> TA <b>ACTTC</b> GTATAGCATA <b>CA</b> TTATACGAA <b>GT</b> TATcga       | 10/10 | HDR-mediated knock-in         |
|                                           | gtgaa <b>TTCA</b> TA <b>ACTTC</b> GTATAGCATA <b>CA</b> TTATACGAA <b>GT</b> TATcga       | 3/9   | HDR-mediated knock-in         |
|                                           | gtgaacggccacgagttcgagatAgagggcga                                                        | 3/9   | 1bp insertion                 |
| #6                                        | gtgaacggccacgagttcgagat <b>GTATGCTATACGAA</b> GT <b>TA</b> -----                        | 2/9   | unexpected insertion of ssODN |
|                                           | gtgaacggccacgagttcgaga - cgagggcga                                                      | 1/9   | 1bp deletion                  |
|                                           | gtgaa <b>TTCA</b> TA <b>ACTTC</b> GTATAGCATA <b>CA</b> TTATACGAA <b>GT</b> TATcga       | 5/8   | HDR-mediated knock-in         |
| #8                                        | gtgaacggccacgagttcgaga - cgagggcga                                                      | 2/8   | 1bp deletion                  |
|                                           | gtgaa <b>TTCA</b> TA <b>ACTTC</b> GTATAGCATA <b>CA</b> TTATACGAA <b>GT</b> TATcgagggcga | 1/8   | unexpected insertion of ssODN |
| #9                                        | gtgaa <b>TTCA</b> TA <b>ACTTC</b> GTATAGCATA <b>CA</b> TTATACGAA <b>GT</b> TATcga       | 6/8   | HDR-mediated knock-in         |
|                                           | gtgaacggccacgagttcgaga - cgagggcga                                                      | 2/8   | 1bp deletion                  |

Sequence used as a target is underlined. Blue indicates the PAM sequence. EcoRI site and loxP sequence are shown in red and green, respectively.

Supplementary Table S4: Sequence analysis of HDR-mediated EcoRV site knock-in embryos

|    |                                                       |       |                               |
|----|-------------------------------------------------------|-------|-------------------------------|
|    | <u>gtgaacggccacgagttcgagatcga</u> <b>ggcga</b>        |       |                               |
|    | gtgaacggccacgagttcgagaTtcgagggcga                     | 4/10  | 1bp insertion                 |
| #1 | gtgaacggccacgagttcgagaGtcgagggcga                     | 3/10  | 1bp insertion                 |
|    | gtgaacggccacgagttcgagaAcgagggcga                      | 3/10  | 1bp insertion                 |
| #2 | gtgaacggccacgagttcgaga <b>tATc</b> gagggcga           | 10/10 | HDR-mediated knock-in         |
|    | gtgaacggccacgagttcgagat-cgagggcga                     | 5/9   | 1bp deletion                  |
| #3 | gtgaacggccacgagttcgaga <b>tATc</b> gagggcga           | 3/9   | HDR-mediated knock-in         |
|    | gtgaacggccacgagttcga----cgagggcga                     | 1/9   | 4bp deletion                  |
| #4 | gtgaacggccacgagttcgagat-cgagggcga                     | 5/10  | 1bp deletion                  |
|    | gtgaacggccacgagttcgagaTtcgagggcga                     | 1/10  | 1bp insertion                 |
|    | gtgaacggccacgagttcgaga <b>tATc</b> GAGGCGAGGGgagggcga | 3/10  | unexpected insertion of ssODN |
| #5 | gtgaacggccacgagttcga----cgagggcga                     | 3/10  | 4bp deletion                  |
|    | gtgaacggccacgagttcgaga <b>tATc</b> gagggcga           | 6/10  | HDR-mediated knock-in         |
|    | gtgaacggccacgagttcgagatcgagggcga                      | 1/10  | WT                            |
|    | gtgaacggccacgagttcgaga <b>tATc</b> gagggcga           | 1/9   | HDR-mediated knock-in         |
| #6 | gtgaacggccacgagttcgaga <b>tATc</b> GAGGgagggcga       | 1/9   | unexpected insertion of ssODN |
|    | gtgaacggccacgagttcgaga <b>tATc</b> GAGGCGAGGGgagggcga | 7/9   | unexpected insertion of ssODN |

Sequence used as a target is underlined. Blue indicates the PAM sequence. EcoRV site is shown in red.

Supplementary Table S5: Sequence analysis of F1 mice generated from mCherry-disrupted F0 mice

| F0   | F1     | Sequence                                                       | Phenotype     |
|------|--------|----------------------------------------------------------------|---------------|
| #171 | 7 mice | ggtgcacatggagggtccgtgaacggccacgagttcgagatcga <u>ggg</u> cgaggg | 34bp deletion |
| #164 | 2 mice | ggtgcacatggagggtccgtgaacggccacga-----                          | 32bp deletion |
|      | 1 mice | ggtgcacatggagggtccgtgaacggccacgagttcga----gagggcgaggg          | 4bp deletion  |
| #165 | 4 mice | ggtgcacatg-----gagggcgaggg                                     | 33bp deletion |

Sequence used as a target is underlined. Blue indicates the PAM sequence.
